# Supplementary material for: Prognostic factors for acute exacerbation of idiopathic pulmonary fibrosis: protocol for a systematic review and meta-analysis
Source: PubMed Central journal article supplement — BMJ Open. 2019 May 24;9(5):e028226. doi: 10.1136/bmjopen-2018-028226 (PMC6537967; doi:10.1136/bmjopen-2018-028226), 2019-05-24
Supplement: bmjopen-2018-028226.draft_revisions.pdf [file bmjopen-2018-028226.draft_revisions.pdf]

# BMJ Open

BMJ Open is committed to open peer review. As part of this commitment we make the peer review history of every article we publish publicly available.

When an article is published we post the peer reviewers' comments and the authors' responses online. We also post the versions of the paper that were used during peer review. These are the versions that the peer review comments apply to.

The versions of the paper that follow are the versions that were submitted during the peer review process. They are not the versions of record or the final published versions. They should not be cited or distributed as the published version of this manuscript.

BMJ Open is an open access journal and the full, final, typeset and author-corrected version of record of the manuscript is available on our site with no access controls, subscription charges or pay-per-view fees (<http://bmjopen.bmj.com>).

If you have any questions on BMJ Open's open peer review process please email [info.bmjopen@bmj.com](mailto:info.bmjopen@bmj.com)

# BMJ Open

## Prognostic factors for acute exacerbation of idiopathic pulmonary fibrosis: a protocol for a systematic review and meta-analysis

|                               |                                                                                                                                                                       |
|-------------------------------|-----------------------------------------------------------------------------------------------------------------------------------------------------------------------|
| Journal:                      | <i>BMJ Open</i>                                                                                                                                                       |
| Manuscript ID                 | bmjopen-2018-028226                                                                                                                                                   |
| Article Type:                 | Protocol                                                                                                                                                              |
| Date Submitted by the Author: | 27-Nov-2018                                                                                                                                                           |
| Complete List of Authors:     | Kamiya, Hiroyuki; University of Western Australia, School of Population and Global Health<br>Panlaqui, Ogee; Northern Hospital, Department of Intensive Care Medicine |
| Keywords:                     | idiopathic pulmonary fibrosis, acute exacerbation, prognosis, review                                                                                                  |
|                               |                                                                                                                                                                       |

SCHOLARONE™  
Manuscripts

1  
2  
3  
4  
5  
6 **TITLE PAGE**  
7  
8  
9

10  
11  
12 **Title**  
13

14  
15 Prognostic factors for acute exacerbation of idiopathic pulmonary fibrosis: a protocol  
16  
17  
18 for a systematic review and meta-analysis  
19  
20  
21  
22  
23

24 **Authors**  
25

26  
27  
28 Hiroyuki Kamiya<sup>1</sup>, Ogee Mer Panlaqui<sup>2</sup>  
29  
30

31  
32 <sup>1</sup> School of Population and Global Health, University of Western Australia, Perth,  
33  
34 Australia  
35

36  
37  
38 <sup>2</sup> Department of Intensive Care Medicine, Northern Hospital, Melbourne, Australia  
39  
40  
41  
42  
43  
44

45 **Correspondence**  
46

47  
48 Hiroyuki Kamiya  
49

50  
51  
52 School of Population and Global Health, University of Western Australia  
53

54  
55  
56 35 Stirling Highway Crawley Western Australia 6009  
57  
58  
59  
60

1  
2  
3  
4  
5  
6 Phone: +61-8-6488-6000  
7  
8

9  
10 Email: mlb04194@nifty.com  
11  
12  
13  
14  
15  
16  
17  
18

19 **Word count**

20  
21  
22 2990  
23  
24  
25  
26  
27

28 **Keywords**

29  
30 idiopathic pulmonary fibrosis, acute exacerbation, prognosis, review  
31  
32  
33  
34  
35  
36  
37  
38  
39  
40  
41  
42  
43  
44  
45  
46  
47  
48  
49  
50  
51  
52  
53  
54  
55  
56  
57  
58  
59  
60

## ABSTRACT

### Introduction

Idiopathic pulmonary fibrosis (IPF) is chronic fibrosing interstitial pneumonia of unknown aetiology. Acute exacerbation of IPF is a phenomenon that demonstrates abrupt deterioration beyond its usually expected disease course without any apparent causes. This condition is noted to be a major cause of death of the disease with 30 days-mortality of 40%. However, there is still a variation in clinical course of this devastating condition. Although some previous studies investigated diverse clinical information that could be related to the prognosis of the disease, they have yet to be confirmed. Therefore, the aim of this systematic review is to clarify prognostic factors for acute exacerbation of IPF.

### Methods and analysis

Acute exacerbation of IPF is eligible for the review. Prognostic factors are any clinical information that can be related to the prognosis of the disease. The primary outcomes are short-term all-cause and pulmonary-cause mortality. The secondary outcomes include the proportion of discharge from the hospital, long-term mortality and health-related quality of life. Primary studies of any type except for a case report or case series are included. Two reviewers search electronic databases such as Medline and

1  
2  
3  
4  
5  
6 EMBASE from inception to the latest and extract data independently. A risk of bias in  
7  
8  
9 individual studies is assessed by the Quality in Prognostic Studies tool. Meta-analysis is  
10  
11  
12 sought to be conducted only for univariate data if at least three studies report the effect  
13  
14  
15 of a specific prognostic factor with the same statistics while multivariate results are  
16  
17  
18 reported qualitatively. Subgroup and sensitivity analyses are considered to identify the  
19  
20  
21 source of heterogeneity. The Grades of Recommendation, Assessment, Development  
22  
23  
24 and Evaluation method is applied to evaluate the evidence level of each prognostic  
25  
26  
27 factor.  
28  
29

### 30 **Ethics and dissemination**

31  
32  
33  
34 There is no concerning ethical issue. The result will be reported in a peer-reviewed  
35  
36  
37 journal.  
38  
39

### 40 **PROSPERO registration**

41  
42  
43 CRD 42018106172  
44  
45  
46  
47  
48  
49  
50  
51  
52  
53  
54  
55  
56  
57  
58  
59  
60

### Strengths and limitations of this study

- The first systematic review addressing prognostic factors for acute exacerbation of idiopathic pulmonary fibrosis, which will be the foremost evidence for this unpredictable and critical condition as conducting a large-scale cohort study may be difficult.
- A focus on relevant clinical information that is commonly used in clinical practice and a presentation of the result of both univariate and multivariate analysis.
- A potential difficulty in combining the result due to a small number of studies and substantial heterogeneity.

## INTRODUCTION

### Rationale

Idiopathic pulmonary fibrosis (IPF) is chronic fibrosing interstitial pneumonia of unknown aetiology and the most common type among idiopathic interstitial pneumonias (IIPs).[1] It is a progressive disease and demonstrates poor prognosis with an average survival of two to three years after the diagnosis.[2] A previous study reported that most patients die of respiratory failure as a consequence of its progressive disease course or

1  
2  
3  
4  
5  
6 other complications such as lung cancer, pneumonia, pulmonary embolism and cardiac  
7  
8  
9 failure.[3] However, after a rapid deterioration of the disease beyond its usually  
10  
11  
12 expected clinical course was recognized as an uncommon phenomenon,[4] this medical  
13  
14  
15 condition was termed as acute exacerbation of IPF and demonstrated to be a major  
16  
17  
18 cause of death of the disease.[5] In early reports it was diagnosed by excluding known  
19  
20  
21 causes of disease deterioration, in particular, eliminating potentially causative infectious  
22  
23  
24 agents was emphasized [6] whereas the latest international guideline proposed a new  
25  
26  
27 diagnostic criteria of acute exacerbation of IPF, which only focused on worsening  
28  
29  
30 symptoms and newly emerging bilateral radiological opacities rather than the aetiology  
31  
32  
33 of the exacerbation.[7] Regardless of the aetiology of this phenomenon, it is noted to be  
34  
35  
36 fatal with 30-days mortality of 40% [8] and 1-year mortality of over 80%,[9] which is  
37  
38  
39 mostly because there has been no effective treatment.[10] Nonetheless, there is still a  
40  
41  
42 variation in clinical course of the disease and some patients survive this devastating  
43  
44  
45 condition.[11] In addition, recent data suggested a promising preventive effect of some  
46  
47  
48 new therapeutic agents.[12] Therefore, it is important to elucidate prognostic factors of  
49  
50  
51 this intractable disease to inform anticipated consequences and plan the best therapeutic  
52  
53  
54 option tailored to an individual patient. Although several studies investigated diverse  
55  
56  
57 clinical information that could be related to the prognosis of acute exacerbation of IPF,  
58  
59  
60



1  
2  
3  
4  
5  
6 most reports were based on a small number of participants in a single institution and  
7  
8  
9 thus may be anecdotal.[13-14] In addition, it seems unfeasible to conduct a large-scale  
10  
11  
12 cohort study to compensate for this shortcoming of previous research because  
13  
14  
15 unpredictable and lethal clinical course might prevent a recruitment of a sufficient  
16  
17  
18 number of participants.[15] Therefore, this systematic review and meta-analysis was  
19  
20  
21 designed to clarify prognostic factors for acute exacerbation of IPF and the result of this  
22  
23  
24 study will be the best evidence currently available for this medical condition. As the aim  
25  
26  
27 of this article is to report the rationale and the methodology of a future systematic  
28  
29  
30 review of prognostic factors for acute exacerbation of IPF to ensure the transparency  
31  
32  
33 and the integrity of research, any result expected to be obtained from this study is not  
34  
35  
36 presented in this report.

### 37 38 39 **Objective of the review**

40  
41  
42 The aim of this systematic review is to clarify prognostic factors for acute exacerbation  
43  
44  
45 of IPF.  
46  
47

## 48 49 **METHODS AND ANALYSIS**

### 50 51 52 **Patient and public involvement**

53  
54  
55  
56  
57  
58  
59  
60

1  
2  
3  
4  
5  
6 There is no patient and public involvement in the whole process of conducting this  
7  
8  
9 research.

### 12 13 **Registration**

14  
15  
16 This protocol was registered with PROSPERO (International Prospective Register of  
17  
18  
19 Systematic Reviews) [16] (CRD42018106172).

### 22 23 **Timeline**

24  
25  
26 This study has yet to be initiated except for a pilot search and constructing search terms.  
27  
28  
29 A full search is scheduled to be conducted on the 1<sup>st</sup> of February 2019 and may be  
30  
31  
32 updated depending on the date of publication of this protocol paper.  
33

### 34 35 36 **Eligibility criteria**

#### 37 38 39 **Participants**

40  
41  
42  
43 Patients with acute exacerbation of IPF are eligible for this review. IPF will be  
44  
45  
46 diagnosed based on previously published international guidelines for diagnosis of the  
47  
48  
49 disease such as an official ATS/ERS/JRS/ALAT statement.[17] Acute exacerbation of  
50  
51  
52 IPF is diagnosed based on the latest international guideline, which consists of previous  
53  
54  
55 or concurrent diagnosis of IPF, acute worsening or development of dyspnoea typically  
56  
57  
58  
59  
60

1  
2  
3  
4  
5  
6 within less than one month, newly emerging bilateral ground glass opacity (GGO)  
7  
8  
9 and/or consolidation superimposed on a background radiological change consistent with  
10  
11  
12 usual interstitial pneumonia (UIP) on high resolution computed tomography (HRCT)  
13  
14  
15 scans.[7] Although it is necessary to rule out cardiac failure or fluid overload as a cause  
16  
17  
18 of deterioration, excluding infections or other potential triggers is no longer required,  
19  
20  
21 which allows this condition to be classified into triggered or idiopathic cases. Previously  
22  
23  
24 proposed diagnostic criteria, which emphasized the exclusion of pulmonary infection  
25  
26  
27 using endotracheal aspirate or bronchoalveolar lavage,[6] is considered as  
28  
29  
30 corresponding to idiopathic cases in this new definition.[7] Therefore, patients  
31  
32  
33 diagnosed by this previous criteria are also eligible. A rapid progressive form of  
34  
35  
36 interstitial pneumonia at the first presentation is also included if it is accompanied by  
37  
38  
39 radiological and/or pathological UIP without known causes such as connective tissue  
40  
41  
42 disease (CTD) [18] and drug toxicity.[19] Patients with multiple episodes of acute  
43  
44  
45 exacerbation are not excluded although only the first event will be considered for  
46  
47  
48 further analysis.

49  
50  
51 Exposure  
52  
53  
54  
55  
56  
57  
58  
59  
60

1  
2  
3  
4  
5  
6 Any clinical information including demographics, symptoms, pulmonary functions,  
7  
8  
9 radiological findings and laboratory tests is considered as potential prognostic factors if  
10  
11  
12 they are investigated for their association with the outcomes. Although therapeutic  
13  
14  
15 intervention can affect the prognosis of the disease, it is excluded from potential  
16  
17  
18 prognostic factors as the effect of treatment on prognosis will be confounded by a  
19  
20  
21 number of factors and thus difficult to be evaluated in prognostic studies.[20]  
22  
23

#### 24 25 Outcomes and prioritization

26  
27  
28 The primary outcomes are short-term all-cause and pulmonary-cause mortality, which  
29  
30  
31 are defined as in-hospital or 30 days-mortality. The secondary outcomes include the  
32  
33  
34 proportion of discharge from the hospital and long-term all-cause mortality, which are  
35  
36  
37 determined at 90 days, 6 months or 1 year after the diagnosis of the disease or start of  
38  
39  
40 treatment. Long-term health-related quality of life is also considered as the secondary  
41  
42  
43 outcome, which will be evaluated by a validated tool such as the 36-Item Short Form  
44  
45  
46 Health Survey (SF-36).[21]  
47  
48

#### 49 50 Studies

51  
52  
53 Any type of primary studies excluding a case report or case series is included in the  
54  
55  
56 review if it describes the association of potential prognostic factors with pre-defined  
57  
58  
59  
60

1  
2  
3  
4  
5  
6 outcomes and quantitative data is presented. If a study summarizes the result narratively  
7  
8  
9 without quantitative data, it is ineligible. Editorials, letters and review articles are  
10  
11  
12 excluded. Conference proceedings and reports with only abstracts are also excluded due  
13  
14  
15 to concerns of insufficient information. Only English articles are eligible and  
16  
17  
18 publication before 2002 is excluded as it is the year when the original form of current  
19  
20  
21 classification system of IIPs was first reported.[1]  
22

### 23 24 25 **Information sources**

26  
27  
28 Medline (via Ovid 1946-)

29  
30  
31  
32 EMBASE (via Ovid 1974-)

33  
34  
35  
36 Science Citation Index Expanded (via Web of Science 1900-)

37  
38  
39  
40 Google Scholar

### 41 42 43 **Search strategy**

44  
45  
46  
47 Two reviewers (H.K. and O.M.P.) search the Medline and the EMBASE using subject  
48  
49  
50 headings and text words of study population, and their synonyms such as 'idiopathic  
51  
52  
53 pulmonary fibrosis' and 'acute exacerbation', which are determined referring to reviews  
54  
55  
56 of a similar subject identified in the Cochrane Database of Systematic Reviews (CDSR).  
57  
58  
59  
60

1  
2  
3  
4  
5  
6 They are combined with the methodology filter of prognosis, which is modified to be  
7  
8  
9 fitted with each electronic database (e-Appendix).[22-23] The Science Citation Index  
10  
11  
12 Expanded is also searched using terms adapted from the search of the Medline and the  
13  
14  
15 EMBASE. These electronic databases are searched from inception through the date of  
16  
17  
18 publication of this protocol paper. Reference lists of eligible studies and relevant review  
19  
20  
21 articles are also hand-searched. Grey literature is sought to be identified through Google  
22  
23  
24 Scholar.[24]  
25

## 26 27 28 **Study records**

### 29 30 31 Data management

32  
33  
34  
35 All retrieved articles are processed through EndNote X7 whereby duplicates are  
36  
37  
38 identified and removed. All extracted data are stored in a Microsoft Excel spreadsheet.  
39  
40  
41

### 42 43 44 Study selection and data collection process

45  
46 Two reviewers (H.K. and O.M.P.) independently examine titles and abstracts of all  
47  
48  
49 retrieved articles after removing duplicates and select eligible reports. If the same  
50  
51  
52 research group conducted multiple studies with the same outcome and the same  
53  
54  
55 prognostic factor, a report with the largest sample size is selected. Data are extracted by  
56  
57  
58 the same reviewers based on a data extraction form, which is modified from a sheet  
59  
60

1  
2  
3  
4  
5  
6 included in a previously published protocol paper of prognostic factor review.[25] An  
7  
8  
9 uncertainty or disagreement encountered through all of these processes is resolved  
10  
11  
12 through discussion between the reviewers.  
13  
14  
15

### 16 **Data items**

17  
18  
19 The following data is extracted: the first author name, publication year, study location,  
20  
21  
22 study design, the number of participants and their demographic features, follow-up  
23  
24  
25 lengths, potential prognostic factors, the outcomes, counts of the outcome, methods for  
26  
27  
28 statistical analysis, summary statistics and items associated with a risk of bias.  
29  
30  
31

### 32 **Candidate of prognostic factors**

33  
34  
35  
36 After collecting data from all eligible studies, the items reported by at least three studies  
37  
38  
39 proceed with further analysis as potential prognostic factors and the studies reporting  
40  
41  
42 those factors are designated as final articles/studies that constitute this review.  
43  
44  
45

### 46 **Risk of bias in individual studies**

47  
48  
49 The Quality in Prognostic Studies (QUIPS) tool is applied to assess a risk of bias in  
50  
51  
52 individual studies. It consists of six domains. Each domain is rated as either high,  
53  
54  
55 moderate or low risk of bias and the overall risk of bias is based on a total rating of all  
56  
57  
58  
59  
60

1  
2  
3  
4  
5  
6 domains. For example, a study showing a low risk of bias in all domains is deemed as  
7  
8  
9 low risk of bias.[26]  
10

## 11 12 13 **Statistical analysis** 14

### 15 16 17 **Summary statistics** 18

19  
20 When the outcome is binary, the effect size will be presented as the hazard ratio (HR)  
21  
22 by the Cox proportional hazards model [27] or the odds ratio (OR) by the logistic  
23  
24 regression model.[28] If the outcome is only presented by the Kaplan-Meier survival  
25  
26 curve or the log rank test, the HR is re-calculated as previously reported.[29] If both the  
27  
28 HR and the log rank test are presented, the former result is prioritized. The OR or the  
29  
30 risk ratio (RR) may be calculated manually based on counts of the outcome in two  
31  
32 comparative groups if it is not available directly. Where the outcome or prognostic  
33  
34 factors are continuous, the effect size may be presented as the absolute values such as  
35  
36 the mean difference by the unpaired Student's t test and the difference of the median by  
37  
38 the Wilcoxon rank sum test.  
39  
40  
41  
42  
43  
44  
45  
46  
47  
48  
49

### 50 51 **Data synthesis** 52

53  
54 The results are pooled if the association of a specific potential prognostic factor with an  
55  
56 outcome is presented by the same summary statistics in three or more studies. The  
57  
58  
59  
60



1  
2  
3  
4  
5  
6 binary outcome is summarized by the OR, RR or HR separately while the continuous  
7  
8  
9 outcome is combined by either the mean difference or the standardized mean difference,  
10  
11  
12 which is calculated as Hedge's  $g$ , [30] depending on whether the outcome is presented  
13  
14  
15 with the same unit. When the median and the range or interquartile range are presented  
16  
17  
18 for continuous variables, they are converted to the mean and the standard deviation,  
19  
20  
21 respectively, using a formula reported by a previous study. [31] Only unadjusted  
22  
23  
24 estimates of the effect of potential prognostic factors are combined while that estimated  
25  
26  
27 from multivariate models is described qualitatively as the adjustment in the model will  
28  
29  
30 be diverse and pooling these data can be misleading. If meta-analysis is feasible, it is  
31  
32  
33 conducted by a random-effects model with the DerSimonian and Laird method [32]  
34  
35  
36 using the statistical software, Review Manager (RevMan) Version 5.3 (Copenhagen:  
37  
38  
39 The Nordic Cochrane Centre, The Cochrane Collaboration, 2014). The 95% prediction  
40  
41  
42 interval will be calculated if combined results are statistically significant and there is  
43  
44  
45 heterogeneity between studies. [33] Statistical significance is set at  $p$ -value  $< 0.05$ . If  
46  
47  
48 combining data is inappropriate due to a small number of studies or substantial clinical  
49  
50  
51 or methodological variability between studies, the result is reported qualitatively.

52  
53  
54  
55 Heterogeneity  
56  
57  
58  
59  
60

1  
2  
3  
4  
5  
6 Between-study variance is estimated as the Tau square and assessed by the Q statistics  
7  
8  
9 and the I square. Statistical significance is set at p-value <0.1 because of low power of  
10  
11  
12 the test and the magnitude of heterogeneity is interpreted as not important (0 to 30%),  
13  
14 moderate (30 to 50%), substantial (50 to 70%) and considerable (70 to 100%).[30] To  
15  
16  
17 clarify the source of heterogeneity subgroup analysis is considered based on the  
18  
19  
20 definition of acute exacerbation of IPF (idiopathic or triggered), study location (Asia  
21  
22  
23 and non-Asia) and sample sizes (less than 50 and 50 or more). Sensitivity analysis will  
24  
25  
26 also be conducted focusing on studies with a low risk of bias alone.  
27  
28  
29

### 30 31 Metabiases

32  
33  
34 Small study bias such as publication bias is examined by both graphical asymmetry of a  
35  
36  
37 funnel plot and the Egger's test [34] if ten or more studies are available that report the  
38  
39  
40 effect of a specific potential prognostic factor. Statistical significance is set at p-value  
41  
42  
43 <0.1 because of low power of the test. If publication bias is suspected, an adjusted  
44  
45  
46 summary effect is estimated by the trim and fill method considering the presumptive  
47  
48  
49 number of missing studies.[35]  
50

### 51 52 53 Confirmation of prognostic factors

1  
2  
3  
4  
5  
6 Prognostic factors are finally determined based on the consistency and statistical  
7  
8  
9 significance of the results. If the effect of a potential prognostic factor is in the same  
10  
11  
12 direction across all studies and statistically significant in the majority of studies ( $\geq 75\%$ )  
13  
14  
15 using both univariate and multivariate analyses, it is deemed as a prognostic factor.

16  
17  
18 Combined data in univariate analysis is regarded as one study in the determination of  
19  
20  
21 prognostic factors.  
22  
23

### 24 25 **Confidence in cumulative evidence**

26  
27  
28 The level of evidence obtained from this systematic review is assessed by the Grades of  
29  
30  
31 Recommendation, Assessment, Development and Evaluation (GRADE) system. It is  
32  
33  
34 applied to both univariate and multivariate results of finally determined prognostic  
35  
36  
37 factors.[36]  
38  
39

### 40 41 **ETHICS AND DISSEMINATION**

42  
43  
44  
45 There is no concerning ethical issue in conducting this systematic review as it is based  
46  
47  
48 on published data with no access to any information that can identify an individual  
49  
50  
51 patient. The result of the review will be formatted and reported following the PRISMA  
52  
53  
54 (Preferred Reporting Items for Systematic Reviews and Meta-Analyses) [37] and the  
55  
56  
57 MOOSE (Meta-analysis of Observational Studies in Epidemiology) statement.[38] A  
58  
59  
60

1  
2  
3  
4  
5  
6 Microsoft Excel spreadsheet containing all data, which is extracted from included  
7  
8  
9 studies and becomes the basis for the analysis, may be provided from the corresponding  
10  
11  
12 author on a reasonable request or stored in a digital repository such as Dryad after the  
13  
14  
15 result of the review is published in a journal so that the original data could be open  
16  
17  
18 accessed.  
19

## 20 21 22 **DISCUSSION**

23  
24  
25 This article has reported the rationale and the methodology of a future systematic review  
26  
27  
28 of prognostic factors for acute exacerbation of IPF. As a systematic review of  
29  
30  
31 prognostic factor studies is methodologically more complicated than that of  
32  
33  
34 intervention,[39] a detailed description of the methodology beforehand is important to  
35  
36  
37 ensure the integrity and transparency of research in this field although a number of  
38  
39  
40 studies are still conducted without it.[40]

41  
42  
43 There are a couple of methodological limitations that need attention to appropriately  
44  
45  
46 interpret the findings of this research. Firstly, prognostic factors are to be determined  
47  
48  
49 based on the result of multivariate analysis, which is summarized qualitatively in this  
50  
51  
52 review. This decision may dismiss the advantage of a systematic review that false  
53  
54  
55 negative results due to a small sample size will be resolved by statistical synthesis [41]  
56  
57  
58  
59  
60

1  
2  
3  
4  
5  
6 and thus some potential prognostic factors may possibly be misclassified as  
7  
8  
9 non-prognostic. However, pooling multivariate data can be misleading as adjusted  
10  
11  
12 variables and the final model will be diverse between studies [42] although it is  
13  
14  
15 important to consider the influence of confounders in prognostic studies since baseline  
16  
17  
18 characteristics of comparative groups will usually be different and the conclusion is  
19  
20  
21 likely to be confounded by these factors.[43] Therefore, we decided to describe the  
22  
23  
24 result of multivariate analysis qualitatively instead of seeking combined summary  
25  
26  
27 estimates. In addition, although the consistency and statistical significance of the results  
28  
29  
30 were adopted as the criteria to determine prognostic factors, they were arbitrary set and  
31  
32  
33 thus some potential prognostic factors may also be disregarded due to this decision.  
34  
35  
36 However, one of the major roles of a systematic review of prognostic factor studies  
37  
38  
39 would be exploring all clinical information possibly related to the prognosis of the  
40  
41  
42 disease rather than discovering a specific prognostic factor.[44] Therefore, we suggest  
43  
44  
45 that all potential prognostic factors should further be examined for their clinical  
46  
47  
48 significance in a well-designed future research even if they are deemed non-prognostic  
49  
50  
51 in this research. The findings of this review also need to be updated with additional  
52  
53  
54 reports in the future.  
55  
56  
57  
58  
59  
60

1  
2  
3  
4  
5  
6 Secondly, eligible studies for this review may be clinically or methodologically diverse.

7  
8  
9 They will be composed of a mixture of both idiopathic and triggered cases of acute  
10  
11 exacerbation of IPF, which will be diagnosed using either previous (narrow) [6] or  
12  
13 current (broad) diagnostic criteria.[7] In addition, the definition of an outcome may also  
14  
15 be varied between studies. Mortality may be evaluated at a various point of time such as  
16  
17 in-hospital, 30 days, 90 days and one year after the diagnosis of the disease or start of  
18  
19 treatment. Furthermore, the effect of continuous factors may be summarized by  
20  
21 dichotomization using a different cut-off point, which will be arbitrarily set by each  
22  
23 research group.[45] These clinical and methodological variability together with likely a  
24  
25 small number of eligible studies may interrupt statistical synthesis of data, which may  
26  
27 undermine the value of a systematic review due to the same reason as mentioned above.  
28  
29

30  
31 However, meta-analysis is only one aspect of this type of research and qualitative  
32  
33 analysis of the result is also valuable and meaningful.  
34  
35

36  
37 Finally, we decided to focus on any clinical information reported by at least three  
38  
39 studies to select potential prognostic factors for further analyses because they might  
40  
41 represent clinically relevant factors commonly used in clinical practice and thus the  
42  
43 applicability of the findings would be enhanced. However, some of the factors reported  
44  
45 by only one or two studies might still be related to the prognosis of the disease and thus  
46  
47  
48  
49  
50  
51  
52  
53  
54  
55  
56  
57  
58  
59  
60

1  
2  
3  
4  
5  
6 this definition of potential prognostic factors might deprive the opportunity for those  
7  
8  
9 factors to be further investigated.  
10

11  
12  
13 It is well recognized that meta-analysis of prognostic factor studies is challenging [39]  
14

15  
16 and there are some potential methodological limitations in our research project.  
17

18  
19 However, we believe that this systematic review would clarify current evidence of  
20  
21 prognostic factors for acute exacerbation of IPF and the integrity and transparency of  
22  
23 the research will be ensured with a support of this protocol paper.  
24  
25  
26  
27

## 28 **CONCLUSIONS**

29  
30  
31  
32 The rationale and methodology of a future systematic review and meta-analysis of  
33  
34 prognostic factors for acute exacerbation of IPF were described. This research may  
35  
36 involve some potential methodological limitations that are often encountered in a  
37  
38 systematic review of prognostic factor studies. However, the result of the review would  
39  
40 present the best evidence currently available in this research area with a support of this  
41  
42 protocol paper.  
43  
44  
45  
46  
47  
48  
49  
50  
51  
52  
53  
54  
55  
56  
57  
58  
59  
60

## **AUTHORS' CONTRIBUTIONS**

Hiroyuki Kamiya (H.K) conceived this research project and planned the entire methods to undertake it. He also wrote the manuscript of this protocol. H.K will be the guarantor of the content of the review including data analysis.

Ogee Mer Panlaqui (O.M.P) made contributions in conceiving this research project and planning literature search strategy and data extraction. He also made additions and revisions to the draft of this manuscript.

## **FUNDING**

This research received no specific grant from any funding agency in the public, commercial or not-for-profit sectors.

## **COMPETING INTERESTS**

There is no conflict of interests to declare for all authors in this protocol paper of a future systematic review.



## REFERENCES

1. American Thoracic Society/European Respiratory Society International Multidisciplinary Consensus Classification of the Idiopathic Interstitial Pneumonias. This joint statement of the American Thoracic Society (ATS), and the European Respiratory Society (ERS) was adopted by the ATS board of directors, June 2001 and by the ERS Executive Committee, June 2001. *Am J Respir Crit Care Med* 2002;165:277-304.
2. Kim DS, Collard HR, King TE, Jr. Classification and natural history of the idiopathic interstitial pneumonias. *Proc Am Thorac Soc* 2006;3:285-92.
3. Panos RJ, Mortenson RL, Niccoli SA, et al. Clinical deterioration in patients with idiopathic pulmonary fibrosis: causes and assessment. *Am J Med* 1990;88:396-404.
4. Kim DS, Park JH, Park BK, et al. Acute exacerbation of idiopathic pulmonary fibrosis: frequency and clinical features. *Eur Respir J* 2006;27:143-50.
5. Ley B, Collard HR, King TE, Jr. Clinical course and prediction of survival in idiopathic pulmonary fibrosis. *Am J Respir Crit Care Med* 2011;183:431-40.
6. Collard HR, Moore BB, Flaherty KR, et al. Acute exacerbations of idiopathic pulmonary fibrosis. *Am J Respir Crit Care Med* 2007;176:636-43.
7. Collard HR, Ryerson CJ, Corte TJ, et al. Acute Exacerbation of Idiopathic

1  
2  
3  
4  
5  
6 Pulmonary Fibrosis. An International Working Group Report. *Am J Respir Crit Care*  
7  
8  
9 *Med* 2016;194:265-75.

10  
11  
12 8. Agarwal R, Jindal SK. Acute exacerbation of idiopathic pulmonary fibrosis: a  
13  
14  
15 systematic review. *Eur J Intern Med* 2008;19:227-35.

16  
17  
18 9. Huie TJ, Olson AL, Cosgrove GP, et al. A detailed evaluation of acute  
19  
20  
21 respiratory decline in patients with fibrotic lung disease: aetiology and outcomes.  
22  
23  
24 *Respirology* 2010;15:909-17.

25  
26  
27 10. Juarez MM, Chan AL, Norris AG, et al. Acute exacerbation of idiopathic  
28  
29  
30 pulmonary fibrosis-a review of current and novel pharmacotherapies. *J Thorac Dis*  
31  
32  
33 2015;7:499-519.

34  
35  
36 11. Song JW, Hong SB, Lim CM, et al. Acute exacerbation of idiopathic  
37  
38  
39 pulmonary fibrosis: incidence, risk factors and outcome. *Eur Respir J* 2011;37:356-63.

40  
41  
42 12. Richeldi L. Time for Prevention of Idiopathic Pulmonary Fibrosis  
43  
44  
45 Exacerbation. *Ann Am Thorac Soc* 2015;12 Suppl 2:S181-5.

46  
47  
48 13. Atsumi K, Saito Y, Kuse N, et al. Prognostic Factors in the Acute Exacerbation  
49  
50  
51 of Idiopathic Pulmonary Fibrosis: A Retrospective Single-center Study. *Intern Med*  
52  
53  
54 2018;57:655-61.

55  
56  
57 14. Simon-Blancal V, Freynet O, Nunes H, et al. Acute exacerbation of idiopathic  
58  
59

1  
2  
3  
4  
5  
6 pulmonary fibrosis: outcome and prognostic factors. *Respiration* 2012;83:28-35.

7  
8  
9 15. Kamiya H, Panlaqui OM, Izumi S, et al. Prognostic factors of idiopathic  
10 inflammatory myopathies complicated with interstitial lung disease: protocol for a  
11 systematic review and meta-analysis. *BMJ Open* 2016;6:e012744.

12  
13  
14  
15  
16  
17  
18 16. Centre for Reviews and Dissemination, University of York. PROSPERO:  
19 International Prospective Register of Systematic Reviews. Available from:  
20  
21 <http://www.crd.york.ac.uk/prospero/>. [Accessed 19 Nov 2018].

22  
23  
24  
25  
26  
27 17. Raghu G, Collard HR, Egan JJ, et al. An official ATS/ERS/JRS/ALAT  
28 statement: idiopathic pulmonary fibrosis: evidence-based guidelines for diagnosis and  
29 management. *Am J Respir Crit Care Med* 2011;183:788-824.

30  
31  
32  
33  
34  
35  
36 18. Gono T, Kawaguchi Y, Satoh T, et al. Clinical manifestation and prognostic  
37 factor in anti-melanoma differentiation-associated gene 5 antibody-associated interstitial  
38 lung disease as a complication of dermatomyositis. *Rheumatology* 2010;49:1713-9.

39  
40  
41  
42  
43  
44  
45 19. Inokuma S. Leflunomide-induced interstitial pneumonitis might be a  
46 representative of disease-modifying antirheumatic drug-induced lung injury. *Expert*  
47  
48  
49  
50  
51 *Opin Drug Saf* 2011;10:603-11.

52  
53  
54 20. Moons KG, Royston P, Vergouwe Y, et al.. Prognosis and prognostic research:  
55 what, why, and how? *BMJ* 2009;338:b375.

- 1  
2  
3  
4  
5  
6  
7  
8  
9  
10  
11  
12  
13  
14  
15  
16  
17  
18  
19  
20  
21  
22  
23  
24  
25  
26  
27  
28  
29  
30  
31  
32  
33  
34  
35  
36  
37  
38  
39  
40  
41  
42  
43  
44  
45  
46  
47  
48  
49  
50  
51  
52  
53  
54  
55  
56  
57  
58  
59  
60
21. Ware JE, Jr, Snow KK, Kosinski M, et al. *SF-36 Health Survey Manual and Interpretation Guide*. Boston, MA: The Health Institute, New England Medical Center 1993.
22. Wilczynski NL, Haynes RB. Developing optimal search strategies for detecting clinically sound prognostic studies in MEDLINE: an analytic survey. *BMC Med* 2004;2:23.
23. Wilczynski NL, Haynes RB. Optimal search strategies for detecting clinically sound prognostic studies in EMBASE: an analytic survey. *J Am Med Inform Assoc* 2005;12:481-5.
24. Haddaway NR, Collins AM, Coughlin D, et al. The Role of Google Scholar in Evidence Reviews and Its Applicability to Grey Literature Searching. *PLoS One* 2015;10:e0138237.
25. Kamiya H, Panlaqui OM. Prognostic significance of autoantibodies for idiopathic pulmonary fibrosis: protocol for a systematic review. *BMJ Open* 2018;8:e020862.
26. Hayden JA, Cote P, Bombardier C. Evaluation of the quality of prognosis studies in systematic reviews. *Ann Intern Med* 2006;144:427-37.
27. Symons MJ, Moore DT. Hazard rate ratio and prospective epidemiological

1  
2  
3  
4  
5  
6 studies. *J Clin Epidemiol* 2002;55:893-9.

7  
8  
9 28. Bock JR, Afifi AA. Estimation of probabilities using the logistic model in  
10 retrospective studies. *Comput Biomed Res* 1988;21:449-70.

11  
12  
13  
14  
15 29. Tierney JF, Stewart LA, Ghersi D, et al. Practical methods for incorporating  
16 summary time-to-event data into meta-analysis. *Trials* 2007;8:16.

17  
18  
19  
20  
21 30. Higgins JPT, Green S, eds. Cochrane Handbook for Systematic Reviews of  
22 Interventions Version 5.1.0 [updated March 2011]. The Cochrane Collaboration 2011.  
23 Available from: <http://www.handbook.cochrane.org>.

24  
25  
26  
27  
28  
29 31. Wan X, Wang W, Liu J, et al. Estimating the sample mean and standard  
30 deviation from the sample size, median, range and/or interquartile range. *BMC Med Res*  
31  
32  
33  
34  
35  
36  
37  
38  
39  
40  
41  
42  
43  
44  
45  
46  
47  
48  
49  
50  
51  
52  
53  
54  
55  
56  
57  
58  
59  
60  
*Methodol* 2014;14:135.

60  
32. DerSimonian R, Laird N. Meta-analysis in clinical trials. *Controlled Clin*  
*Trials* 1986;7:177-88.

33. Riley RD, Higgins JP, Deeks JJ. Interpretation of random effects  
meta-analyses. *BMJ* 2011;342:d549.

34. Egger M, Davey Smith G, Schneider M, et al. Bias in meta-analysis detected  
by a simple, graphical test. *BMJ* 1997;315:629-34.

35. Duval S, Tweedie R. Trim and fill: A simple funnel-plot-based method of

1  
2  
3  
4  
5  
6 testing and adjusting for publication bias in meta-analysis. *Biometrics* 2000;56:455-63.  
7  
8

9 36. Iorio A, Spencer FA, Falavigna M, et al. Use of GRADE for assessment of  
10 evidence about prognosis: rating confidence in estimates of event rates in broad  
11 categories of patients. *BMJ* 2015;350:h870.  
12  
13  
14  
15  
16

17 37. Moher D, Liberati A, Tetzlaff J, et al. Preferred reporting items for systematic  
18 reviews and meta-analyses: the PRISMA statement. *Ann Intern Med* 2009;151:264-9.  
19  
20  
21  
22  
23

24 38. Stroup DF, Berlin JA, Morton SC, et al. Meta-analysis of observational studies  
25 in epidemiology: a proposal for reporting. Meta-analysis Of Observational Studies in  
26 Epidemiology (MOOSE) group. *JAMA* 2000;283:2008-12.  
27  
28  
29  
30  
31

32 39. Altman DG. Systematic reviews of evaluations of prognostic variables. *BMJ*  
33 2001;323:224-8.  
34  
35  
36  
37  
38

39 40. Tsujimoto Y, Tsujimoto H, Kataoka Y, et al. Majority of systematic reviews  
40 published in high-impact journals neglected to register the protocols: a  
41 meta-epidemiological study. *J Clin Epidemiol* 2017;84:54-60.  
42  
43  
44  
45  
46  
47

48 41. Crowther M, Lim W, Crowther MA. Systematic review and meta-analysis  
49 methodology. *Blood* 2010;116:3140-6.  
50  
51  
52  
53

54 42. Fisher AV, Fernandes-Taylor S, Campbell-Flohr SA, et al. 30-day Readmission  
55 After Pancreatic Resection: A Systematic Review of the Literature and Meta-analysis.  
56  
57  
58  
59  
60

1  
2  
3  
4  
5  
6  
7  
8  
9  
10  
11  
12  
13  
14  
15  
16  
17  
18  
19  
20  
21  
22  
23  
24  
25  
26  
27  
28  
29  
30  
31  
32  
33  
34  
35  
36  
37  
38  
39  
40  
41  
42  
43  
44  
45  
46  
47  
48  
49  
50  
51  
52  
53  
54  
55  
56  
57  
58  
59  
60

*Ann Surg* 2017;266:242-50.

43. Smith GD, Phillips AN. Confounding in epidemiological studies: why "independent" effects may not be all they seem. *BMJ* 1992;305:757-9.

44. Riley RD, Hayden JA, Steyerberg EW, et al. Prognosis Research Strategy (PROGRESS) 2: prognostic factor research. *PLoS Med* 2013;10:e1001380.

45. Royston P, Altman DG, Sauerbrei W. Dichotomizing continuous predictors in multiple regression: a bad idea. *Stat Med* 2006;25:127-41.

## e-Appendix: Search terms for Ovid Medline

- 1 exp Lung Diseases, Interstitial/
- 2 exp Idiopathic Pulmonary Fibrosis/
- 3 (interstitial adj3 lung adj3 disease\$.mp.
- 4 (interstitial adj3 pneumoni\$.mp.
- 5 (pulmonary adj3 fibros\$.mp.
- 6 exp Disease Progression /
- 7 (acute exacerbation\$.mp.
- 8 (disease progression\$.mp.
- 9 (disease exacerbation\$.mp.
- 10 incidence.sh.
- 11 exp Mortality/
- 12 follow-up studies.sh.
- 13 prognos\$.tw.
- 14 predict\$.tw.



1  
2  
3  
4  
5  
6  
7  
8  
9  
10  
11  
12  
13  
14  
15  
16  
17  
18  
19  
20  
21  
22  
23  
24  
25  
26  
27  
28  
29  
30  
31  
32  
33  
34  
35  
36  
37  
38  
39  
40  
41  
42  
43  
44  
45  
46  
47  
48  
49  
50  
51  
52  
53  
54  
55  
56  
57  
58  
59  
60

- 15 course\$.tw.
- 16 1 or 2 or 3 or 4 or 5
- 17 6 or 7 or 8 or 9
- 18 10 or 11 or 12 or 13 or 14 or 15
- 19 16 and 17 and 18

For peer review only

**PRISMA-P (Preferred Reporting Items for Systematic review and Meta-Analysis Protocols) 2015 checklist: recommended items to address in a systematic review protocol\***

| Section and topic                 | Item No | Page No in the manuscript | Checklist item                                                                                                                                                                                                                |
|-----------------------------------|---------|---------------------------|-------------------------------------------------------------------------------------------------------------------------------------------------------------------------------------------------------------------------------|
| <b>ADMINISTRATIVE INFORMATION</b> |         |                           |                                                                                                                                                                                                                               |
| Title:                            |         |                           |                                                                                                                                                                                                                               |
| Identification                    | 1a      | Page 1                    | Identify the report as a protocol of a systematic review                                                                                                                                                                      |
| Update                            | 1b      | Not applicable            | If the protocol is for an update of a previous systematic review, identify as such                                                                                                                                            |
| Registration                      | 2       | Page 4, 8                 | If registered, provide the name of the registry (such as PROSPERO) and registration number                                                                                                                                    |
| Authors:                          |         |                           |                                                                                                                                                                                                                               |
| Contact                           | 3a      | Page 1-2                  | Provide name, institutional affiliation, e-mail address of all protocol authors; provide physical mailing address of corresponding author                                                                                     |
| Contributions                     | 3b      | Page 22                   | Describe contributions of protocol authors and identify the guarantor of the review                                                                                                                                           |
| Amendments                        | 4       | Not applicable            | If the protocol represents an amendment of a previously completed or published protocol, identify as such and list changes; otherwise, state plan for documenting important protocol amendments                               |
| Support:                          |         |                           |                                                                                                                                                                                                                               |
| Sources                           | 5a      | Page 22                   | Indicate sources of financial or other support for the review                                                                                                                                                                 |
| Sponsor                           | 5b      | Page 22                   | Provide name for the review funder and/or sponsor                                                                                                                                                                             |
| Role of sponsor or funder         | 5c      | Page 22                   | Describe roles of funder(s), sponsor(s), and/or institution(s), if any, in developing the protocol                                                                                                                            |
| <b>INTRODUCTION</b>               |         |                           |                                                                                                                                                                                                                               |
| Rationale                         | 6       | Page 5-7                  | Describe the rationale for the review in the context of what is already known                                                                                                                                                 |
| Objectives                        | 7       | Page 7                    | Provide an explicit statement of the question(s) the review will address with reference to participants, interventions, comparators, and outcomes (PICO)                                                                      |
| <b>METHODS</b>                    |         |                           |                                                                                                                                                                                                                               |
| Eligibility criteria              | 8       | Page 8-11                 | Specify the study characteristics (such as PICO, study design, setting, time frame) and report characteristics (such as years considered, language, publication status) to be used as criteria for eligibility for the review |
| Information sources               | 9       | Page 11                   | Describe all intended information sources (such as electronic databases, contact with study authors, trial registers or other grey literature sources) with planned dates of coverage                                         |
| Search strategy                   | 10      | Page 11-12                | Present draft of search strategy to be used for at least one electronic database, including planned limits, such that it could be repeated                                                                                    |

|                                    |     |            |                                                                                                                                                                                                                                                  |
|------------------------------------|-----|------------|--------------------------------------------------------------------------------------------------------------------------------------------------------------------------------------------------------------------------------------------------|
| Study records:                     |     |            |                                                                                                                                                                                                                                                  |
| Data management                    | 11a | Page 12    | Describe the mechanism(s) that will be used to manage records and data throughout the review                                                                                                                                                     |
| Selection process                  | 11b | Page 12    | State the process that will be used for selecting studies (such as two independent reviewers) through each phase of the review (that is, screening, eligibility and inclusion in meta-analysis)                                                  |
| Data collection process            | 11c | Page 12-13 | Describe planned method of extracting data from reports (such as piloting forms, done independently, in duplicate), any processes for obtaining and confirming data from investigators                                                           |
| Data items                         | 12  | Page 13    | List and define all variables for which data will be sought (such as PICO items, funding sources), any pre-planned data assumptions and simplifications                                                                                          |
| Outcomes and prioritization        | 13  | Page 10    | List and define all outcomes for which data will be sought, including prioritization of main and additional outcomes, with rationale                                                                                                             |
| Risk of bias in individual studies | 14  | Page 13-14 | Describe anticipated methods for assessing risk of bias of individual studies, including whether this will be done at the outcome or study level, or both; state how this information will be used in data synthesis                             |
| Data synthesis                     | 15a | Page 14-15 | Describe criteria under which study data will be quantitatively synthesised                                                                                                                                                                      |
|                                    | 15b | Page 14-15 | If data are appropriate for quantitative synthesis, describe planned summary measures, methods of handling data and methods of combining data from studies, including any planned exploration of consistency (such as $I^2$ , Kendall's $\tau$ ) |
|                                    | 15c | Page 16    | Describe any proposed additional analyses (such as sensitivity or subgroup analyses, meta-regression)                                                                                                                                            |
|                                    | 15d | Page 15    | If quantitative synthesis is not appropriate, describe the type of summary planned                                                                                                                                                               |
| Meta-bias(es)                      | 16  | Page 16    | Specify any planned assessment of meta-bias(es) (such as publication bias across studies, selective reporting within studies)                                                                                                                    |
| Confidence in cumulative evidence  | 17  | Page 17    | Describe how the strength of the body of evidence will be assessed (such as GRADE)                                                                                                                                                               |

**\* It is strongly recommended that this checklist be read in conjunction with the PRISMA-P Explanation and Elaboration (cite when available) for important clarification on the items. Amendments to a review protocol should be tracked and dated. The copyright for PRISMA-P (including checklist) is held by the PRISMA-P Group and is distributed under a Creative Commons Attribution Licence 4.0.**

*From: Shamseer L, Moher D, Clarke M, Ghersi D, Liberati A, Petticrew M, Shekelle P, Stewart L, PRISMA-P Group. Preferred reporting items for systematic review and meta-analysis protocols (PRISMA-P) 2015: elaboration and explanation. BMJ. 2015 Jan 2;349(jan02 1):g7647.*

# BMJ Open

## Prognostic factors for acute exacerbation of idiopathic pulmonary fibrosis: protocol for a systematic review and meta-analysis

|                                 |                                                                                                                                                                       |
|---------------------------------|-----------------------------------------------------------------------------------------------------------------------------------------------------------------------|
| Journal:                        | <i>BMJ Open</i>                                                                                                                                                       |
| Manuscript ID                   | bmjopen-2018-028226.R1                                                                                                                                                |
| Article Type:                   | Protocol                                                                                                                                                              |
| Date Submitted by the Author:   | 21-Mar-2019                                                                                                                                                           |
| Complete List of Authors:       | Kamiya, Hiroyuki; University of Western Australia, School of Population and Global Health<br>Panlaqui, Ogee; Northern Hospital, Department of Intensive Care Medicine |
| <b>Primary Subject Heading</b>: | Respiratory medicine                                                                                                                                                  |
| Secondary Subject Heading:      | Respiratory medicine                                                                                                                                                  |
| Keywords:                       | idiopathic pulmonary fibrosis, acute exacerbation, prognosis, review                                                                                                  |
|                                 |                                                                                                                                                                       |

SCHOLARONE™  
Manuscripts

1  
2  
3  
4  
5  
6 **TITLE PAGE**  
7  
8  
9

10  
11  
12 **Title**  
13

14  
15 Prognostic factors for acute exacerbation of idiopathic pulmonary fibrosis: protocol for a  
16 systematic review and meta-analysis  
17  
18  
19

20  
21  
22  
23  
24 **Authors**  
25

26  
27  
28 Hiroyuki Kamiya<sup>1</sup>, Ogee Mer Panlaqui<sup>2</sup>  
29

30  
31  
32 <sup>1</sup> School of Population and Global Health, University of Western Australia, Perth,  
33  
34 Australia  
35

36  
37  
38 <sup>2</sup> Department of Intensive Care Medicine, Northern Hospital, Melbourne, Australia  
39  
40  
41  
42  
43  
44

45 **Correspondence**  
46

47  
48 Hiroyuki Kamiya  
49

50  
51  
52 School of Population and Global Health, University of Western Australia  
53

54  
55  
56 35 Stirling Highway Crawley Western Australia 6009  
57  
58  
59

1  
2  
3  
4  
5  
6  
7  
8  
9  
10  
11  
12  
13  
14  
15  
16  
17  
18  
19  
20  
21  
22  
23  
24  
25  
26  
27  
28  
29  
30  
31  
32  
33  
34  
35  
36  
37  
38  
39  
40  
41  
42  
43  
44  
45  
46  
47  
48  
49  
50  
51  
52  
53  
54  
55  
56  
57  
58  
59  
60

Phone: +61-8-6488-6000

Email: mlb04194@nifty.com

**Word count**

2825

**Keywords**

Idiopathic pulmonary fibrosis, acute exacerbation, prognosis, review

## ABSTRACT

### Introduction

Idiopathic pulmonary fibrosis (IPF) is a form of chronic fibrosing interstitial pneumonia with unknown disease aetiology. Acute exacerbation (AE) of IPF occurs when disease progression accelerates beyond its expected course. AE of IPF is responsible for 40% of IPF's 30-day-mortality. While death may occur, there is much variation in the clinical progression of this condition. Previous attempts have been made to investigate various possible prognostic factors for AE of IPF, however, they have yet to be confirmed. The aim of this systematic review is to clarify these prognostic factors.

### Methods and analysis

In this review, AE of IPF is the condition of interest, which has been defined according to previously established diagnostic criteria. The primary outcomes of interest include short-term all-cause mortality and pulmonary-cause mortality. The secondary outcomes of interest include long-term mortality and hospital-separation for the disease. Primary studies investigating prognostic factors for AE of IPF are eligible for inclusion in this review. All study types are permitted except case reports. Two reviewers will search electronic databases; such as Medline and EMBASE, from 2002 to the 1<sup>st</sup> of April 2019 and extract data independently. Risk of bias in individual studies will be assessed using

1  
2  
3  
4  
5  
6 the Quality in Prognostic Studies tool. Meta-analysis will be conducted for univariate  
7  
8  
9 data if at least three studies report the effect of a specific prognostic factor using similar  
10  
11  
12 statistical methods. Multivariate results will be reported qualitatively. Subgroup analysis  
13  
14  
15 and sensitivity analysis will be considered with the aim of generalising findings to the  
16  
17  
18 clinical settings and drawing more robust conclusions. The ‘GRADE’ method (Grades of  
19  
20  
21 Recommendation, Assessment, Development and Evaluation) will be applied to evaluate  
22  
23  
24 the quality of evidence for each prognostic factor.  
25

### 26 27 **Ethics and dissemination** 28

29  
30 Ethical approval will not be required. Results will be reported in a peer-reviewed  
31  
32  
33 scientific journal.  
34  
35

### 36 37 **PROSPERO registration** 38

39  
40 CRD 42018106172  
41  
42  
43  
44  
45  
46  
47  
48  
49  
50  
51  
52  
53  
54  
55  
56  
57  
58  
59  
60



### Strengths and limitations of this study

- This systematic review and meta-analysis will be the first addressing prognostic factors for AE of IPF and be the foremost evidence for this potentially fatal disease as large-scale cohort studies investigating this disease may prove difficult.
- This study will focus on relevant clinical information, commonly used in clinical practice, which may facilitate the application of the review's findings to the clinical setting.
- There may be difficulty in combining the result due to substantial heterogeneity between studies.

## INTRODUCTION

### Rationale

Idiopathic pulmonary fibrosis (IPF) is a form of chronic fibrosing interstitial pneumonia with unknown disease aetiology. IPF is the most common type of pneumonia amongst idiopathic interstitial pneumonias (IIPs).[1] IPF is a progressive disease which can result in death. A recent study in the U.S. found that patients over the age of 65 had a median survival time of 3.8 years.[2] Another study reported numerous complications resulting from IPF such as lung cancer, pneumonia, pulmonary embolism and heart

1  
2  
3  
4  
5  
6 failure, with mortality often a consequence of respiratory failure due to IPF.[3]  
7  
8

9 However, after a rapid deterioration of IPF beyond its usually expected clinical course  
10 was recognized as not uncommon phenomenon,[4] this condition was termed as acute  
11 exacerbation (AE) of IPF and demonstrated to be a major cause of death of the  
12 disease.[5] In early reports AE of IPF was diagnosed by excluding known causes of  
13 disease deterioration, in particular, eliminating potentially causative infectious  
14 agents.[6] However, the latest international guideline proposed a new diagnostic criteria  
15 for AE of IPF, which isolates worsening symptoms and newly-emerging bilateral  
16 radiological opacities, rather than focusing on the aetiology of the exacerbation.[7]  
17  
18 Irrespective of the aetiology of this phenomenon, it can be fatal, with a 30-day mortality  
19 rate of 40%,[8] and a 1-year mortality of over 80%.[9] The absence of effective  
20 treatment may explain the high rate of mortality.[10]  
21  
22  
23  
24  
25  
26  
27  
28  
29  
30  
31  
32  
33  
34  
35  
36  
37  
38  
39  
40  
41

42 The clinical course of AE of IPF can vary and does not always lead to immediate death  
43 in affected individuals.[11] Recently, some studies trialling anti-fibrotic agents  
44 suggested a promising preventive effect for disease progression from IPF.[12] To better  
45 prevent against the harmful effects of AE of IPF, prognostic factors for the disease must  
46 be determined. Identifying these factors may help in tailoring specific treatment options  
47 to affected patients and better anticipate the consequence of this disease. Several studies  
48  
49  
50  
51  
52  
53  
54  
55  
56  
57  
58  
59  
60

1  
2  
3  
4  
5  
6 have investigated diverse clinical information that could be related to the prognosis of  
7  
8  
9 AE of IPF. However, these studies have been limited by small sample sizes drawn from  
10  
11  
12 a single institution.[13-14] Furthermore, it seems unfeasible to conduct a large-scale  
13  
14  
15 cohort study to compensate for this shortcoming of previous research because  
16  
17  
18 unpredictable and lethal clinical course might prevent a recruitment of a sufficient  
19  
20  
21 number of participants.[15] Due to the disparity of existing evidence, the aim of the  
22  
23  
24 proposed systematic review and meta-analysis is to clarify prognostic factors for AE of  
25  
26  
27 IPF. The results from this study will be the leading evidence available for this condition.  
28  
29  
30 The aim of this article is to rationalise the need for a systematic review of prognostic  
31  
32  
33 factors for AE of IPF and outline a proposed methodology for research integrity and  
34  
35  
36 transparency. Expected results of this study will not be discussed in this article.  
37  
38

### 39 **Research aims**

40  
41  
42 The aim of the proposed systematic review is to clarify prognostic factors for AE of  
43  
44  
45 IPF.  
46  
47

## 48 **METHODS AND ANALYSIS**

### 49 **Patient and public involvement**

50  
51  
52  
53  
54  
55  
56  
57  
58  
59  
60

1  
2  
3  
4  
5  
6 There is no patient and public involvement in the whole process of conducting this  
7  
8  
9 research.

### 10 11 12 13 **Registration**

14  
15  
16 This protocol has already been registered with PROSPERO (International Prospective  
17  
18  
19 Register of Systematic Reviews) [16] (CRD42018106172).

### 20 21 22 23 **Eligibility criteria**

#### 24 25 26 **Subjects**

27  
28  
29  
30 Patients with AE of IPF are eligible for this review. IPF will be diagnosed based on  
31  
32  
33 previously published international guidelines, such as an official American Thoracic  
34  
35  
36 Society/European Respiratory Society/Japanese Respiratory Society/Latin American  
37  
38  
39 Thoracic Association (ATS/ERS/JRS/ALAT) statement.[17] AE of IPF will be  
40  
41  
42 diagnosed based on the latest international guideline, which consists of a previous or  
43  
44  
45 concurrent diagnosis of IPF, acute worsening or development of dyspnoea (typically  
46  
47  
48 within less than one month), newly emerging bilateral ground glass opacity (GGO),  
49  
50  
51 and/or consolidation superimposed on a background radiological change consistent with  
52  
53  
54 usual interstitial pneumonia (UIP) on high resolution computed tomography (HRCT)  
55  
56  
57 scans.[7] Although it is necessary to rule out cardiac failure or fluid overload as a cause  
58  
59  
60

1  
2  
3  
4  
5  
6 of deterioration of IPF, infections or other potential triggers of AE of IPF do not need to  
7  
8  
9 be excluded, as per the latest diagnostic criteria, which accounts for both triggered and  
10  
11  
12 idiopathic cases. Accordingly, previously proposed diagnostic criteria, (which  
13  
14  
15 emphasized the exclusion of pulmonary infection using endotracheal aspirate or  
16  
17  
18 bronchoalveolar lavage),[6] can be used to justify the inclusion of idiopathic cases for  
19  
20  
21 the disease under the latest diagnostic criteria.[7] Subjects diagnosed with a rapid  
22  
23  
24 progressive form of interstitial pneumonia at their first presentation will also be  
25  
26  
27 included. However, their diagnosis must have been accompanied by radiological and/or  
28  
29  
30 pathological UIP, and known causes for the disease, such as connective tissue disease  
31  
32  
33 (CTD) [18] or drug toxicity must have been absent.[19] In cases where patients had  
34  
35  
36 multiple episodes of AE of IPF, only the first presentation of the disease will be  
37  
38  
39 considered for further analysis.

#### 42 43 Exposures

44  
45  
46 Any clinical information related to demographics, symptoms, pulmonary functions,  
47  
48  
49 radiological findings and laboratory tests will be considered as potential prognostic  
50  
51  
52 factors for AE of IPF, provided they have been investigated for their association with  
53  
54  
55 the outcomes of the disease. These factors may include; age, sex, breathlessness,  
56  
57  
58

1  
2  
3  
4  
5  
6 percentage of predicted forced vital capacity (%FVC), percentage of predicted diffusion  
7  
8  
9 capacity of the lung for carbon monoxide (%DLCO), arterial oxygen pressure (PaO<sub>2</sub>),  
10  
11  
12 Krebs von den Lungen-6 (KL-6), ground glass opacity (GGO) and consolidation on  
13  
14  
15 high resolution computed tomography (HRCT).  
16

### 17 18 19 Outcomes and prioritization 20

21  
22 The primary outcomes of interest will be short-term all-cause mortality and pulmonary-  
23  
24 cause mortality, defined as in-hospital mortality or 30-day mortality. The secondary  
25  
26 outcomes of interest will include the proportion of patients discharged from the hospital  
27  
28 and long-term all-cause mortality, determined at 90 days, 6 months or 1 year after the  
29  
30 diagnosis of the disease or the start of treatment. Long-term health-related quality of life  
31  
32 will also be considered, and will be evaluated according to a validated tool such as the  
33  
34 36-Item Short Form Health Survey (SF-36).[20]  
35  
36  
37  
38  
39  
40  
41  
42  
43  
44

### 45 Studies 46 47

48 All primary study types (excluding case reports) will be considered for review, provided  
49  
50 quantitative data has been used and they describe an association between potential  
51  
52 prognostic factors and pre-defined outcomes for AE of IPF. Furthermore, editorials,  
53  
54 letters and review articles will not be considered. Conference proceedings and reports  
55  
56  
57  
58  
59  
60

1  
2  
3  
4  
5  
6 containing abstracts only will not be considered to alleviate concerns of insufficient  
7  
8  
9 information. Research papers prior to 2002 will not be considered, as 2002 marked the  
10  
11 first year when the current classification system of IIPs was first introduced.[1] Only  
12  
13 articles published in English will be reviewed.  
14  
15  
16  
17  
18

### 19 **Information sources**

20  
21  
22 Medline (via Ovid 2002-present)

23  
24  
25  
26 EMBASE (via Ovid 2002-present)

27  
28  
29  
30 Science Citation Index Expanded (via Web of Science 2002-present)

31  
32  
33  
34 Google Scholar

### 35 36 37 **Search strategy**

38  
39  
40 Two reviewers (H.K. and O.M.P.) will search electronic databases, such as Medline and  
41  
42  
43 EMBASE using subject headings and text words related to study population such as  
44  
45  
46  
47 'idiopathic pulmonary fibrosis' and 'acute exacerbation'. The Cochrane Database of  
48  
49  
50 Systematic Reviews (CDSR) will guide the search process by finding reviews similar to  
51  
52  
53 this area of research. Search terms will be combined with methodology filters for  
54  
55  
56 prognosis, which can be modified to fit each electronic database (e-Appendix).[21-22]  
57  
58  
59  
60

1  
2  
3  
4  
5  
6 The Science Citation Index Expanded will also be consulted using terms adapted from  
7  
8  
9 the previous search of Medline and EMBASE. The search period spans 2002 through to  
10  
11  
12 the 1<sup>st</sup> of April 2019. The reference list of each study eligible for inclusion in this  
13  
14  
15 review will also be hand-searched to consolidate the implemented search strategy. Grey  
16  
17  
18 literature for this subject area will be identified using Google Scholar.[23]  
19  
20  
21

## 22 **Study records**

### 23 24 25 Data management

26  
27  
28 All retrieved articles will be processed through EndNote X7, where duplicates can be  
29  
30  
31 identified and removed. All extracted data will be stored in a Microsoft Excel  
32  
33  
34 spreadsheet.  
35  
36  
37

### 38 39 Study selection and the data collection process

40  
41  
42 Two reviewers (H.K. and O.M.P.) will independently examine the titles and abstracts of  
43  
44  
45 all retrieved articles (after removing duplicates), to identify eligible reports. In cases  
46  
47  
48 where one research group conducted multiple studies with the same outcome of interest  
49  
50  
51 focusing on the same prognostic factor(s), only the study with the largest sample size  
52  
53  
54 will be considered. Data will be extracted based on a modified data extraction form used  
55  
56  
57 in a previously published protocol paper reviewing prognostic factors.[24] Any  
58  
59  
60



1  
2  
3  
4  
5  
6 uncertainty or disagreement between reviewers arising from these processes will be  
7  
8  
9 resolved by discussion.  
10

### 11 12 13 **Data items**

14  
15  
16 The following data will be extracted from each eligible study: first author's name, year  
17  
18 of publication, study location, study design, sample size (and their demographic  
19  
20 features), outcomes of interest, potential prognostic factors for disease, potential  
21  
22 aetiology of disease, length of follow-up, methods for statistical analysis, summary  
23  
24 statistics and items associated with risk of bias.  
25  
26  
27  
28  
29

### 30 31 32 Candidate prognostic factors

33  
34  
35 Any clinical information relevant to the pre-specified outcomes, reported by a minimum  
36  
37 of three separate studies will be further investigated as potential prognostic factors for  
38  
39 this review.  
40  
41  
42  
43  
44

### 45 46 **Risk of bias in individual studies**

47  
48  
49 The Quality in Prognostic Studies (QUIPS) tool will be applied to assess risk of bias in  
50  
51 individual studies. QUIPS consists of six domains. Each domain receives an individual  
52  
53 bias rating (low, moderate or high), with overall risk of bias based on the combined  
54  
55  
56  
57  
58  
59  
60

1  
2  
3  
4  
5  
6 rating of each domain. For example, a study showing low risk of bias across all domains  
7  
8  
9 would be deemed as having low risk of bias overall.[25]  
10

## 11 12 13 **Statistical analysis**

### 14 15 16 Summary statistics

17  
18  
19  
20 Where binary outcomes are presented, effect sizes will be measured using either Hazard  
21  
22 Ratios (HRs) derived from Cox Proportional Hazards models [26] or Odds Ratios (ORs)  
23  
24 derived from Logistic Regression models.[27] Where an outcome is presented only  
25  
26 using a Kaplan-Meier survival curve or log-rank test, HRs will be re-calculated, as  
27  
28 previously reported.[28] Where both HRs and log-rank tests are presented, HRs will be  
29  
30 prioritized. ORs or risk ratios (RRs) may be calculated manually based on absolute  
31  
32 numbers of the outcome of interest across two groups under comparison. Where  
33  
34 prognostic factors or the outcome of interest are measured as continuous variables,  
35  
36 effect sizes may be presented as absolute values using mean difference (calculated by  
37  
38 the unpaired Student's t test) or difference in medians (calculated by the Wilcoxon rank  
39  
40 sum test).  
41  
42  
43  
44  
45  
46  
47  
48  
49  
50  
51  
52  
53

### 54 Data synthesis

55  
56  
57  
58  
59  
60

1  
2  
3  
4  
5  
6 Where an association between one potential prognostic factor and an outcome of  
7  
8  
9 interest is presented using the same summary statistics in three or more studies, results  
10  
11  
12 will be pooled. Binary outcome will be summarized separately using ORs, RRs or HRs.  
13  
14  
15 Continuous outcomes will be combined using mean difference or standardized mean  
16  
17  
18 difference (calculated as Hedge's  $g$ ),<sup>[29]</sup> based on whether outcomes are presented  
19  
20  
21 using the same unit(s). When the median, range or interquartile range are presented for  
22  
23  
24 continuous variables, they will be converted to a respective mean value with a standard  
25  
26  
27 deviation, using a formula reported by a previous study.<sup>[30]</sup> Only unadjusted effect  
28  
29  
30 estimates for potential prognostic factors will be combined. Effect estimates from  
31  
32  
33 multivariate models will be described qualitatively, as model-adjustments will likely  
34  
35  
36 vary significantly, such that pooling these data could be misleading. If meta-analysis is  
37  
38  
39 feasible from the collated data, it will be conducted using a random-effects model  
40  
41  
42 employing the DerSimonian and Laird method.<sup>[31]</sup> If possible, meta-analysis will be  
43  
44  
45 conducted using the statistical software package, Review Manager (RevMan) Version  
46  
47  
48 5.3 (Copenhagen: The Nordic Cochrane Centre, The Cochrane Collaboration, 2014).  
49  
50  
51 The 95% prediction interval will be calculated if combined results are presented and  
52  
53  
54 heterogeneity between studies has been determined.<sup>[32]</sup> Statistical significance is  
55  
56  
57 considered with respect to a p-value of  $<0.05$ . If combining data is deemed  
58  
59  
60

1  
2  
3  
4  
5  
6 inappropriate (due to a small number of studies or substantial clinical or methodological  
7  
8  
9 variability between studies), results will be reported qualitatively.  
10

### 11 12 13 Heterogeneity between studies

14  
15  
16 Between-study variance will be estimated with respect to the Tau square value, and  
17  
18 assessed using both Q statistics and the I square value. For the assessment of  
19  
20 heterogeneity between studies, statistical significance will be considered with respect to  
21  
22 a p-value of  $<0.1$  due to the low power of the test. Magnitude of heterogeneity can be  
23  
24 categorised as low (0 to 30%), moderate (30 to 50%), considerable (50 to 70%) and  
25  
26 substantial (70 to 100%).<sup>[29]</sup> To better interpret sources of heterogeneity, subgroup  
27  
28 analysis will be conducted based on: the definition of AE of IPF (idiopathic or  
29  
30 triggered), study location (Asia or non-Asia) and sample sizes ( $N < 50$  or  $N \geq 50$ ).  
31  
32  
33  
34  
35  
36  
37  
38  
39

40 Sensitivity analysis will also be conducted focusing on studies with low risk of bias.  
41  
42  
43

### 44 Reporting bias

45  
46  
47 Small study bias (such as publication bias) will be examined using graphical asymmetry  
48  
49 of a funnel plot and Egger's test, if ten or more studies are available that report the  
50  
51 effect of a specific potential prognostic factor for AE of IPF.<sup>[33]</sup> Statistical significance  
52  
53 will be considered with respect to a p-value of  $<0.1$  due to the low power of the test. If  
54  
55  
56  
57  
58  
59  
60

1  
2  
3  
4  
5  
6 publication bias is suspected, an adjusted summary effect will be estimated using the  
7 trim and fill method, which considers the presumptive number of missing studies.[34]  
8  
9

### 10 11 12 13 Confirmation of prognostic factors 14

15  
16 Prognostic factors will be determined and judged based on statistically significant  
17 findings and the consistency of results. Prognostic factors will be confirmed if their  
18 effects are consistently in the same direction across all studies and statistically  
19 significant in at least 75% of the included studies. Effects from multivariate analyses  
20 will be considered for confirmation of prognostic factors.  
21  
22  
23  
24  
25  
26  
27  
28  
29  
30

### 31 32 **Confidence in cumulative evidence** 33

34  
35 The credibility of evidence generated from this systematic review will be assessed by  
36 the Grades of Recommendation, Assessment, Development and Evaluation (GRADE)  
37 system. The GRADE system will be applied to the final list of confirmed prognostic  
38 factors generated from both univariate and multivariate results.[35]  
39  
40  
41  
42  
43  
44  
45  
46  
47

### 48 49 **ETHICS AND DISSEMINATION** 50

51  
52 Extensive ethical consideration will not be required to conduct this systematic review as  
53 evidence will be generated from existing published data. Furthermore, patient-level or  
54  
55  
56  
57  
58  
59  
60

1  
2  
3  
4  
5  
6 potentially identifiable information will not be accessed. The results of the review will  
7  
8  
9 be reported according to PRISMA (Preferred Reporting Items for Systematic Reviews  
10  
11 and Meta-Analyses) [36] and MOOSE (Meta-analysis of Observational Studies in  
12  
13 Epidemiology) guidelines.[37] A Microsoft Excel spreadsheet containing all data  
14  
15 gathered for this review will be stored in a digital repository such as Dryad after  
16  
17  
18 publication and may be made available for open access upon reasonable request to the  
19  
20  
21  
22  
23  
24  
25 corresponding author.  
26

## 27 28 **DISCUSSION**

29  
30  
31 This article has outlined the rationale for a methodologically sound systematic review of  
32  
33 prognostic factors for AE of IPF. Due to the relative complexity of conducting  
34  
35  
36  
37 systematic reviews of prognostic factors,[38] a detailed description of the proposed  
38  
39  
40 methodology was required to ensure transparency and research integrity for the  
41  
42  
43 proposed study.[39]  
44

45  
46  
47 There are several methodological limitations that warrant discussion to appropriately  
48  
49 interpret the findings of this proposed study. Firstly, prognostic factors will be  
50  
51  
52 determined based on the result of multivariate analysis, which will be summarized  
53  
54  
55  
56 qualitatively in this review. This may result in the omission or misclassification of  
57  
58  
59  
60

1  
2  
3  
4  
5  
6 potential prognostic factors due to the low power of individual studies with small  
7  
8  
9 sample sizes. Statistical synthesis is expected to solve this issue.[40] However, pooling  
10  
11  
12 multivariate data can be misleading as adjusted variables and the final model will be  
13  
14  
15 diverse between studies [41] Besides, prognostic factors will be determined based on  
16  
17  
18 statistically significant results and the consistency of findings. This is an arbitrary  
19  
20  
21 measure which may disregard other potentially viable prognostic factors for the disease.  
22  
23  
24 Therefore, even if some potential prognostic factors are not confirmed in this proposed  
25  
26  
27 study, we suggest that all identified factors be examined for their clinical significance in  
28  
29  
30 future research. Furthermore, the results of this proposed study should be updated to  
31  
32  
33 include future research.

34  
35  
36  
37 Secondly, it is likely that studies identified for this review will be both clinically and  
38  
39  
40 methodologically heterogeneous. The included studies may contain a mix of patients  
41  
42  
43 with both idiopathic and triggered forms of AE of IPF, diagnosed using the previous  
44  
45  
46 (narrow) [6] or current (broad) diagnostic criteria.[7] Additionally, the definition of an  
47  
48  
49 outcome may also vary between studies. For example, mortality may be evaluated at  
50  
51  
52 different time-scales across studies, such as: in-hospital, 30 days, 90 days or one year  
53  
54  
55 after the diagnosis of the disease or the start of treatment. Comparison of outcomes may  
56  
57  
58 be further complicated for continuous factors, which could be categorized with arbitrary  
59  
60

1  
2  
3  
4  
5  
6 cut-off points, imposed by each respective research group.[42] While these limitations  
7  
8  
9 may undermine some of the statistical capabilities of the proposed meta-analysis, a  
10  
11  
12 qualitative description of results may also provide meaningful insights into prognostic  
13  
14  
15 factors for AE of IPF.  
16

17  
18  
19 Finally, potential prognostic factors will be selected for further analyses if they are  
20  
21  
22 reported in a minimum of three separate studies. Repeated mention of clinical  
23  
24  
25 information may suggest clinical relevance, which could serve to improve the  
26  
27  
28 applicability of our findings. By employing this inclusion criteria, potential prognostic  
29  
30  
31 factors reported by only one or two studies will be omitted. This will deprive these  
32  
33  
34 potential prognostic factors from further investigation in this study and may stifle their  
35  
36  
37 further research in other studies.  
38

39  
40  
41 Despite the potential methodological limitations discussed in this protocol paper, we  
42  
43  
44 believe in the value of clarifying current evidence surrounding prognostic factors for AE  
45  
46  
47 of IPF through systematic review. Peer-review of this protocol paper will also serve to  
48  
49  
50 improve the integrity and transparency of our proposed research.  
51

## 52 53 **CONCLUSION** 54 55 56 57 58 59 60



1  
2  
3  
4  
5  
6 This protocol paper outlined the need for a methodologically sound systematic review  
7  
8  
9 of prognostic factors for AE of IPF. The methodological limitations of the proposed  
10  
11  
12 study are common to research examining prognostic factors and are largely  
13  
14  
15 unavoidable. Despite these limitations, this study would represent the leading body of  
16  
17  
18 evidence for this area of research.  
19  
20  
21  
22  
23  
24  
25  
26  
27  
28  
29  
30  
31  
32  
33  
34  
35  
36  
37  
38  
39  
40  
41  
42  
43  
44  
45  
46  
47  
48  
49  
50  
51  
52  
53  
54  
55  
56  
57  
58  
59  
60

For peer review only

## ACKNOWLEDGEMENTS

We would like to thank Mr. Istvan T. Kabdebo of The School of Population and Global Health, University of Western Australia for his support in editing this manuscript.

## AUTHORS' CONTRIBUTIONS

Hiroyuki Kamiya (H.K) conceptualised this research project and its associated methodology. H.K. also wrote the manuscript for this protocol. H.K will be the guarantor of the content of the review including data analysis.

Ogee Mer Panlaqui (O.M.P) contributed in the conceptualisation of this research project by planning the literature search strategy and data extraction methods. O.M.P. also made additions and revisions to the draft of this manuscript.

## FUNDING

The proposed research has received no specific grant from a funding agency in the public, commercial or not-for-profit sectors.

## CONFLICTS OF INTEREST

There are no conflicts of interest to declare for all authors in this protocol paper of the proposed systematic review.

## REFERENCES

1. American Thoracic Society/European Respiratory Society International Multidisciplinary Consensus Classification of the Idiopathic Interstitial Pneumonias. This joint statement of the American Thoracic Society (ATS), and the European Respiratory Society (ERS) was adopted by the ATS board of directors, June 2001 and by the ERS Executive Committee, June 2001. *Am J Respir Crit Care Med* 2002;165:277-304.
2. Raghu G, Chen SY, Yeh WS, et al. Idiopathic pulmonary fibrosis in US Medicare beneficiaries aged 65 years and older: incidence, prevalence, and survival, 2001-11. *Lancet Respir Med* 2014;2:566-72.
3. Kärkkäinen M, Nurmi H, Kettunen HP, et al. Underlying and immediate causes of death in patients with idiopathic pulmonary fibrosis. *BMC Pulm Med* 2018;18:69.
4. Kim DS, Park JH, Park BK, et al. Acute exacerbation of idiopathic pulmonary fibrosis: frequency and clinical features. *Eur Respir J* 2006;27:143-50.
5. Ley B, Collard HR, King TE, Jr. Clinical course and prediction of survival in idiopathic pulmonary fibrosis. *Am J Respir Crit Care Med* 2011;183:431-40.
6. Collard HR, Moore BB, Flaherty KR, et al. Acute exacerbations of idiopathic pulmonary fibrosis. *Am J Respir Crit Care Med* 2007;176:636-43.
7. Collard HR, Ryerson CJ, Corte TJ, et al. Acute Exacerbation of Idiopathic

1  
2  
3  
4  
5  
6 Pulmonary Fibrosis. An International Working Group Report. *Am J Respir Crit Care Med*

7  
8  
9 2016;194:265-75.

10  
11  
12 8. Agarwal R, Jindal SK. Acute exacerbation of idiopathic pulmonary fibrosis: a  
13  
14  
15 systematic review. *Eur J Intern Med* 2008;19:227-35.

16  
17  
18 9. Huie TJ, Olson AL, Cosgrove GP, et al. A detailed evaluation of acute  
19  
20  
21 respiratory decline in patients with fibrotic lung disease: aetiology and outcomes.  
22  
23  
24 *Respirology* 2010;15:909-17.

25  
26  
27 10. Juarez MM, Chan AL, Norris AG, et al. Acute exacerbation of idiopathic  
28  
29  
30 pulmonary fibrosis-a review of current and novel pharmacotherapies. *J Thorac Dis*  
31  
32  
33 2015;7:499-519.

34  
35  
36 11. Song JW, Hong SB, Lim CM, et al. Acute exacerbation of idiopathic pulmonary  
37  
38  
39 fibrosis: incidence, risk factors and outcome. *Eur Respir J* 2011;37:356-63.

40  
41  
42 12. Richeldi L. Time for Prevention of Idiopathic Pulmonary Fibrosis Exacerbation.  
43  
44  
45 *Ann Am Thorac Soc* 2015;12 Suppl 2:S181-5.

46  
47  
48 13. Atsumi K, Saito Y, Kuse N, et al. Prognostic Factors in the Acute Exacerbation  
49  
50  
51 of Idiopathic Pulmonary Fibrosis: A Retrospective Single-center Study. *Intern Med*  
52  
53  
54 2018;57:655-61.

55  
56  
57 14. Simon-Blancal V, Freynet O, Nunes H, et al. Acute exacerbation of idiopathic  
58  
59

1  
2  
3  
4  
5  
6  
7 pulmonary fibrosis: outcome and prognostic factors. *Respiration* 2012;83:28-35.

8  
9 15. Kamiya H, Panlaqui OM, Izumi S, et al. Prognostic factors of idiopathic  
10  
11  
12  
13  
14  
15  
16  
17  
18  
19  
20  
21  
22  
23  
24  
25  
26  
27  
28  
29  
30  
31  
32  
33  
34  
35  
36  
37  
38  
39  
40  
41  
42  
43  
44  
45  
46  
47  
48  
49  
50  
51  
52  
53  
54  
55  
56  
57  
58  
59  
60  
inflammatory myopathies complicated with interstitial lung disease: protocol for a  
systematic review and meta-analysis. *BMJ Open* 2016;6:e012744.

16. Centre for Reviews and Dissemination, University of York. PROSPERO:  
International Prospective Register of Systematic Reviews. Available from:  
<http://www.crd.york.ac.uk/prospero/>. [Accessed 19 Nov 2018].

17. Raghu G, Collard HR, Egan JJ, et al. An official ATS/ERS/JRS/ALAT  
statement: idiopathic pulmonary fibrosis: evidence-based guidelines for diagnosis and  
management. *Am J Respir Crit Care Med* 2011;183:788-824.

18. Gono T, Kawaguchi Y, Satoh T, et al. Clinical manifestation and prognostic  
factor in anti-melanoma differentiation-associated gene 5 antibody-associated interstitial  
lung disease as a complication of dermatomyositis. *Rheumatology* 2010;49:1713-9.

19. Inokuma S. Leflunomide-induced interstitial pneumonitis might be a  
representative of disease-modifying antirheumatic drug-induced lung injury. *Expert Opin  
Drug Saf* 2011;10:603-11.

20. Ware JE, Jr, Snow KK, Kosinski M, et al. *SF-36 Health Survey Manual and  
Interpretation Guide*. Boston, MA: The Health Institute, New England Medical Center

1  
2  
3  
4  
5  
6 1993.

7  
8  
9 21. Wilczynski NL, Haynes RB. Developing optimal search strategies for detecting  
10 clinically sound prognostic studies in MEDLINE: an analytic survey. *BMC Med*  
11  
12 2004;2:23.

13  
14  
15 22. Wilczynski NL, Haynes RB. Optimal search strategies for detecting clinically  
16 sound prognostic studies in EMBASE: an analytic survey. *J Am Med Inform Assoc*  
17  
18 2005;12:481-5.

19  
20  
21 23. Haddaway NR, Collins AM, Coughlin D, et al. The Role of Google Scholar in  
22 Evidence Reviews and Its Applicability to Grey Literature Searching. *PLoS One*  
23  
24 2015;10:e0138237.

25  
26  
27 24. Kamiya H, Panlaqui OM. Prognostic significance of autoantibodies for  
28 idiopathic pulmonary fibrosis: protocol for a systematic review. *BMJ Open*  
29  
30 2018;8:e020862.

31  
32  
33 25. Hayden JA, Cote P, Bombardier C. Evaluation of the quality of prognosis studies  
34 in systematic reviews. *Ann Intern Med* 2006;144:427-37.

35  
36  
37 26. Symons MJ, Moore DT. Hazard rate ratio and prospective epidemiological  
38 studies. *J Clin Epidemiol* 2002;55:893-9.

39  
40  
41 27. Bock JR, Afifi AA. Estimation of probabilities using the logistic model in

retrospective studies. *Comput Biomed Res* 1988;21:449-70.

28. Tierney JF, Stewart LA, Ghersi D, et al. Practical methods for incorporating summary time-to-event data into meta-analysis. *Trials* 2007;8:16.

29. Higgins JPT, Green S, eds. *Cochrane Handbook for Systematic Reviews of Interventions* Version 5.1.0 [updated March 2011]. The Cochrane Collaboration 2011. Available from: <http://www.handbook.cochrane.org>.

30. Wan X, Wang W, Liu J, et al. Estimating the sample mean and standard deviation from the sample size, median, range and/or interquartile range. *BMC Med Res Methodol* 2014;14:135.

31. DerSimonian R, Laird N. Meta-analysis in clinical trials. *Controlled Clin Trials* 1986;7:177-88.

32. Riley RD, Higgins JP, Deeks JJ. Interpretation of random effects meta-analyses. *BMJ* 2011;342:d549.

33. Egger M, Davey Smith G, Schneider M, et al. Bias in meta-analysis detected by a simple, graphical test. *BMJ* 1997;315:629-34.

34. Duval S, Tweedie R. Trim and fill: A simple funnel-plot-based method of testing and adjusting for publication bias in meta-analysis. *Biometrics* 2000;56:455-63.

35. Iorio A, Spencer FA, Falavigna M, et al. Use of GRADE for assessment of

1  
2  
3  
4  
5  
6 evidence about prognosis: rating confidence in estimates of event rates in broad categories  
7  
8  
9 of patients. *BMJ* 2015;350:h870.

10  
11  
12 36. Moher D, Liberati A, Tetzlaff J, et al. Preferred reporting items for systematic  
13  
14 reviews and meta-analyses: the PRISMA statement. *Ann Intern Med* 2009;151:264-9.

15  
16  
17 37. Stroup DF, Berlin JA, Morton SC, et al. Meta-analysis of observational studies  
18  
19 in epidemiology: a proposal for reporting. Meta-analysis Of Observational Studies in  
20  
21 Epidemiology (MOOSE) group. *JAMA* 2000;283:2008-12.

22  
23  
24 38. Altman DG. Systematic reviews of evaluations of prognostic variables. *BMJ*  
25  
26  
27 2001;323:224-8.

28  
29  
30 39. Tsujimoto Y, Tsujimoto H, Kataoka Y, et al. Majority of systematic reviews  
31  
32 published in high-impact journals neglected to register the protocols: a meta-  
33  
34 epidemiological study. *J Clin Epidemiol* 2017;84:54-60.

35  
36  
37 40. Crowther M, Lim W, Crowther MA. Systematic review and meta-analysis  
38  
39 methodology. *Blood* 2010;116:3140-6.

40  
41  
42 41. Fisher AV, Fernandes-Taylor S, Campbell-Flohr SA, et al. 30-day Readmission  
43  
44 After Pancreatic Resection: A Systematic Review of the Literature and Meta-analysis.  
45  
46  
47 *Ann Surg* 2017;266:242-50.

48  
49  
50 42. Royston P, Altman DG, Sauerbrei W. Dichotomizing continuous predictors in  
51  
52  
53



multiple regression: a bad idea. *Stat Med* 2006;25:127-41.

For peer review only

1  
2  
3  
4  
5  
6  
7  
8  
9  
10  
11  
12  
13  
14  
15  
16  
17  
18  
19  
20  
21  
22  
23  
24  
25  
26  
27  
28  
29  
30  
31  
32  
33  
34  
35  
36  
37  
38  
39  
40  
41  
42  
43  
44  
45  
46  
47  
48  
49  
50  
51  
52  
53  
54  
55  
56  
57  
58  
59  
60

## e-Appendix: Search terms for Ovid Medline

- 1 exp Lung Diseases, Interstitial/
- 2 exp Idiopathic Pulmonary Fibrosis/
- 3 (interstitial adj3 lung adj3 disease\$.mp.
- 4 (interstitial adj3 pneumoni\$.mp.
- 5 (pulmonary adj3 fibros\$.mp.
- 6 exp Disease Progression /
- 7 (acute exacerbation\$.mp.
- 8 (disease progression\$.mp.
- 9 (disease exacerbation\$.mp.
- 10 incidence.sh.
- 11 exp Mortality/
- 12 follow-up studies.sh.
- 13 prognos\$.tw.
- 14 predict\$.tw.

1  
2  
3  
4  
5  
6  
7  
8  
9  
10  
11  
12  
13  
14  
15  
16  
17  
18  
19  
20  
21  
22  
23  
24  
25  
26  
27  
28  
29  
30  
31  
32  
33  
34  
35  
36  
37  
38  
39  
40  
41  
42  
43  
44  
45  
46  
47  
48  
49  
50  
51  
52  
53  
54  
55  
56  
57  
58  
59  
60

- 15 course\$.tw.
- 16 1 or 2 or 3 or 4 or 5
- 17 6 or 7 or 8 or 9
- 18 10 or 11 or 12 or 13 or 14 or 15
- 19 16 and 17 and 18

For peer review only

**PRISMA-P (Preferred Reporting Items for Systematic review and Meta-Analysis Protocols) 2015 checklist: recommended items to address in a systematic review protocol\***

| Section and topic                 | Item No | Page No in the manuscript | Checklist item                                                                                                                                                                                                                |
|-----------------------------------|---------|---------------------------|-------------------------------------------------------------------------------------------------------------------------------------------------------------------------------------------------------------------------------|
| <b>ADMINISTRATIVE INFORMATION</b> |         |                           |                                                                                                                                                                                                                               |
| Title:                            |         |                           |                                                                                                                                                                                                                               |
| Identification                    | 1a      | Page 1                    | Identify the report as a protocol of a systematic review                                                                                                                                                                      |
| Update                            | 1b      | Not applicable            | If the protocol is for an update of a previous systematic review, identify as such                                                                                                                                            |
| Registration                      | 2       | Page 4, 8                 | If registered, provide the name of the registry (such as PROSPERO) and registration number                                                                                                                                    |
| Authors:                          |         |                           |                                                                                                                                                                                                                               |
| Contact                           | 3a      | Page 1-2                  | Provide name, institutional affiliation, e-mail address of all protocol authors; provide physical mailing address of corresponding author                                                                                     |
| Contributions                     | 3b      | Page 21                   | Describe contributions of protocol authors and identify the guarantor of the review                                                                                                                                           |
| Amendments                        | 4       | Not applicable            | If the protocol represents an amendment of a previously completed or published protocol, identify as such and list changes; otherwise, state plan for documenting important protocol amendments                               |
| Support:                          |         |                           |                                                                                                                                                                                                                               |
| Sources                           | 5a      | Page 21                   | Indicate sources of financial or other support for the review                                                                                                                                                                 |
| Sponsor                           | 5b      | Page 21                   | Provide name for the review funder and/or sponsor                                                                                                                                                                             |
| Role of sponsor or funder         | 5c      | Page 21                   | Describe roles of funder(s), sponsor(s), and/or institution(s), if any, in developing the protocol                                                                                                                            |
| <b>INTRODUCTION</b>               |         |                           |                                                                                                                                                                                                                               |
| Rationale                         | 6       | Page 5-7                  | Describe the rationale for the review in the context of what is already known                                                                                                                                                 |
| Objectives                        | 7       | Page 7                    | Provide an explicit statement of the question(s) the review will address with reference to participants, interventions, comparators, and outcomes (PICO)                                                                      |
| <b>METHODS</b>                    |         |                           |                                                                                                                                                                                                                               |
| Eligibility criteria              | 8       | Page 8-11                 | Specify the study characteristics (such as PICO, study design, setting, time frame) and report characteristics (such as years considered, language, publication status) to be used as criteria for eligibility for the review |
| Information sources               | 9       | Page 11                   | Describe all intended information sources (such as electronic databases, contact with study authors, trial registers or other grey literature sources) with planned dates of coverage                                         |
| Search strategy                   | 10      | Page 11-12                | Present draft of search strategy to be used for at least one electronic database, including planned limits, such that it could be repeated                                                                                    |

|                                    |     |            |                                                                                                                                                                                                                                                  |
|------------------------------------|-----|------------|--------------------------------------------------------------------------------------------------------------------------------------------------------------------------------------------------------------------------------------------------|
| Study records:                     |     |            |                                                                                                                                                                                                                                                  |
| Data management                    | 11a | Page 12    | Describe the mechanism(s) that will be used to manage records and data throughout the review                                                                                                                                                     |
| Selection process                  | 11b | Page 12    | State the process that will be used for selecting studies (such as two independent reviewers) through each phase of the review (that is, screening, eligibility and inclusion in meta-analysis)                                                  |
| Data collection process            | 11c | Page 12    | Describe planned method of extracting data from reports (such as piloting forms, done independently, in duplicate), any processes for obtaining and confirming data from investigators                                                           |
| Data items                         | 12  | Page 13    | List and define all variables for which data will be sought (such as PICO items, funding sources), any pre-planned data assumptions and simplifications                                                                                          |
| Outcomes and prioritization        | 13  | Page 10    | List and define all outcomes for which data will be sought, including prioritization of main and additional outcomes, with rationale                                                                                                             |
| Risk of bias in individual studies | 14  | Page 13    | Describe anticipated methods for assessing risk of bias of individual studies, including whether this will be done at the outcome or study level, or both; state how this information will be used in data synthesis                             |
| Data synthesis                     | 15a | Page 14-15 | Describe criteria under which study data will be quantitatively synthesised                                                                                                                                                                      |
|                                    | 15b | Page 14-15 | If data are appropriate for quantitative synthesis, describe planned summary measures, methods of handling data and methods of combining data from studies, including any planned exploration of consistency (such as $I^2$ , Kendall's $\tau$ ) |
|                                    | 15c | Page 16    | Describe any proposed additional analyses (such as sensitivity or subgroup analyses, meta-regression)                                                                                                                                            |
|                                    | 15d | Page 15    | If quantitative synthesis is not appropriate, describe the type of summary planned                                                                                                                                                               |
| Meta-bias(es)                      | 16  | Page 16    | Specify any planned assessment of meta-bias(es) (such as publication bias across studies, selective reporting within studies)                                                                                                                    |
| Confidence in cumulative evidence  | 17  | Page 17    | Describe how the strength of the body of evidence will be assessed (such as GRADE)                                                                                                                                                               |

**\* It is strongly recommended that this checklist be read in conjunction with the PRISMA-P Explanation and Elaboration (cite when available) for important clarification on the items. Amendments to a review protocol should be tracked and dated. The copyright for PRISMA-P (including checklist) is held by the PRISMA-P Group and is distributed under a Creative Commons Attribution Licence 4.0.**

*From: Shamseer L, Moher D, Clarke M, Ghersi D, Liberati A, Petticrew M, Shekelle P, Stewart L, PRISMA-P Group. Preferred reporting items for systematic review and meta-analysis protocols (PRISMA-P) 2015: elaboration and explanation. BMJ. 2015 Jan 2;349(jan02 1):g7647.*
