# Supplementary material for: Prognostic factors for acute exacerbation of idiopathic pulmonary fibrosis: protocol for a systematic review and meta-analysis
Source: PubMed Central journal article supplement — BMJ Open. 2019 May 24;9(5):e028226. doi: 10.1136/bmjopen-2018-028226 (PMC6537967; doi:10.1136/bmjopen-2018-028226), 2019-05-24
Supplement: bmjopen-2018-028226supp001.pdf [file bmjopen-2018-028226supp001.pdf]

e-Appendix: Search terms for Ovid Medline

- 1 exp Lung Diseases, Interstitial/
- 2 exp Idiopathic Pulmonary Fibrosis/
- 3 (interstitial adj3 lung adj3 disease\$).mp.
- 4 (interstitial adj3 pneumoni\$).mp.
- 5 (pulmonary adj3 fibros\$).mp.
- 6 exp Disease Progression /
- 7 (acute exacerbation\$).mp.
- 8 (disease progression\$).mp.
- 9 (disease exacerbation\$).mp.
- 10 incidence.sh.
- 11 exp Mortality/
- 12 follow-up studies.sh.
- 13 prognos\$.tw.
- 14 predict\$.tw.

15 course\$.tw.

16 1 or 2 or 3 or 4 or 5

17 6 or 7 or 8 or 9

18 10 or 11 or 12 or 13 or 14 or 15

19 16 and 17 and 18
